# Supplementary material for: NanoString Digital Molecular Profiling of Protein and microRNA in Rhabdomyosarcoma
Source: MDPI journal article supplement (doi:10.3390/cancers14030522), 2022-01-21
Supplement: s1 [file s1]

**Supplementary Table S2.** Predicted affected genes in association with number of involved miRNA's.

| Gene    | Number of miRNA's |
|---------|-------------------|
| KMT2C   | 72                |
| TNRC6B  | 70                |
| NFAT5   | 66                |
| ONECUT2 | 65                |
| QKI     | 65                |
| NFIB    | 65                |
| INO80D  | 62                |
| CELF2   | 60                |
| LCOR    | 59                |
| USP9X   | 58                |
| NTRK3   | 58                |
| NUFIP2  | 58                |
| NOVA1   | 57                |
| TNRC6A  | 56                |
| UBN2    | 56                |
| ZNF148  | 56                |
| IKZF2   | 55                |
| CBX5    | 55                |
| NCR3LG1 | 54                |
| CNOT6L  | 53                |
| ATXN1   | 53                |
| ZFHX4   | 53                |
| TNPO1   | 53                |
| REV3L   | 53                |
| MECP2   | 52                |
| BNC2    | 52                |

|        |    |
|--------|----|
| POU2F1 | 52 |
| UBE2W  | 52 |
| TANC2  | 52 |
| PTEN   | 52 |
