# Supplementary material for: NanoString Digital Molecular Profiling of Protein and microRNA in Rhabdomyosarcoma
Source: MDPI journal article supplement (doi:10.3390/cancers14030522), 2022-01-21
Supplement: s1 [file s1]

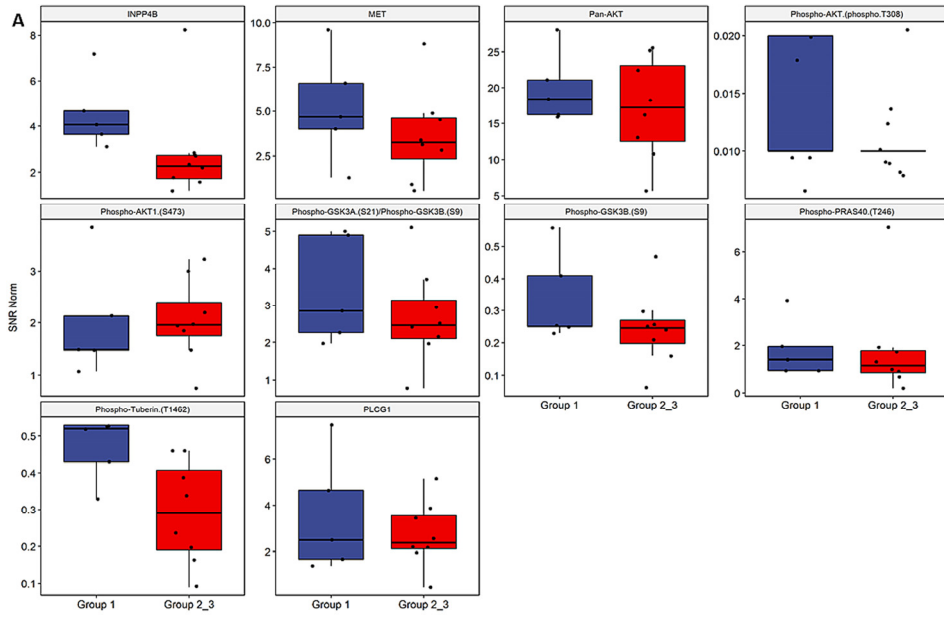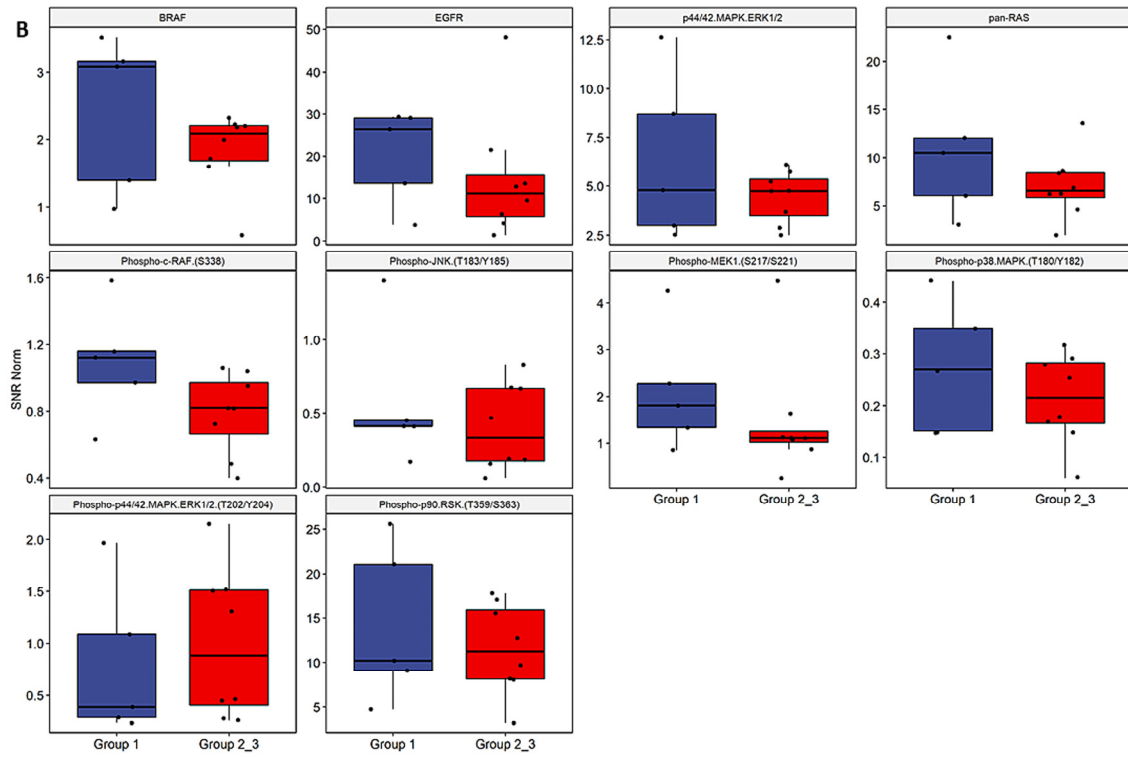

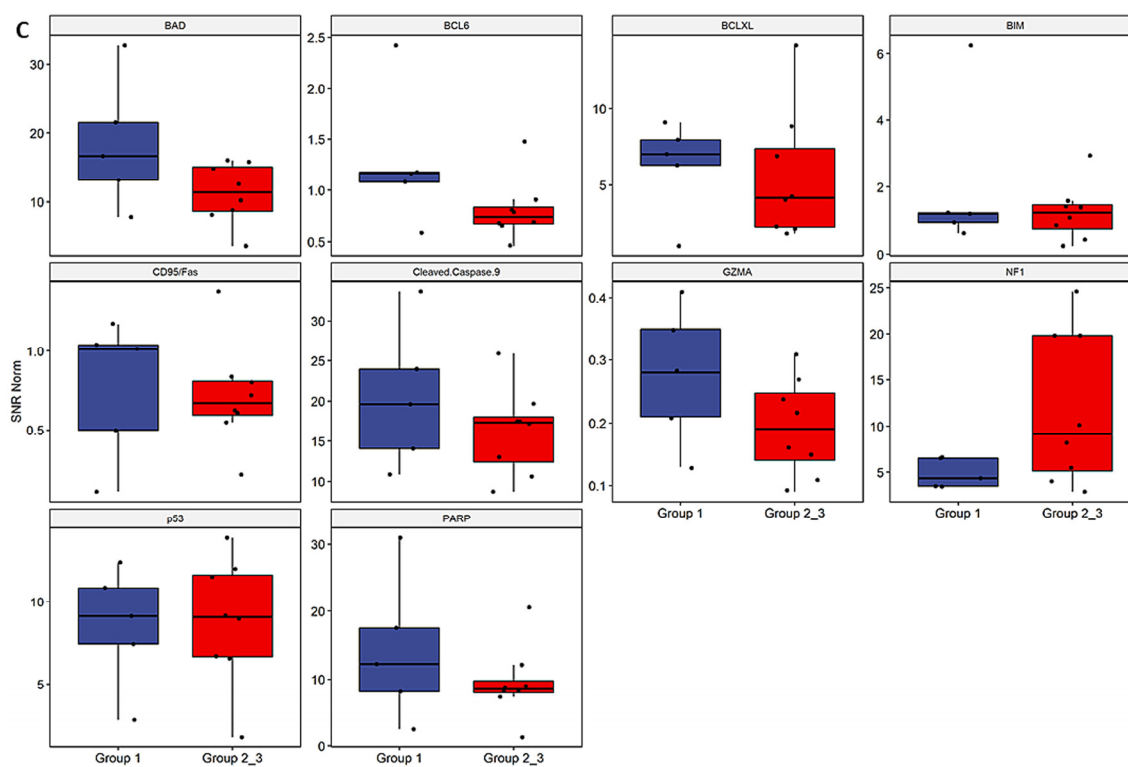

**Figure S1.** Box data illustrating expression of pathway components in the tumor groups, as illustrated by NSR values. A. PI3K-AKT components in Group 1 versus combined Groups 2 and 3; B. MAPK components in Group 1 versus combined Groups 2 and 3; C. Cell death module in Group 1 versus combined Groups 2 and 3.
